# Supplementary material for: Vitamin K3 derivative induces apoptotic cell death in neuroblastoma via downregulation of MYCN expression
Source: PubMed Central journal article supplement — Biochem Biophys Rep. 2019 Oct 31;20:100701. doi: 10.1016/j.bbrep.2019.100701 (PMC6895568; doi:10.1016/j.bbrep.2019.100701), 2019-10-31

# Supplementary Figure S1

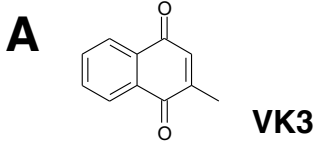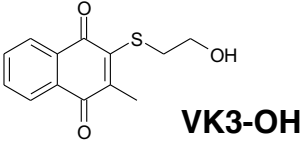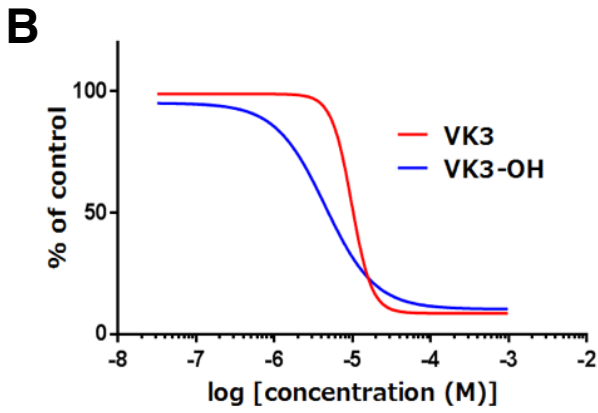

| Cell lines | VK3 ( $\mu\text{M}$ ) | VK3-OH ( $\mu\text{M}$ ) |
|------------|-----------------------|--------------------------|
| HEK293     | 9.8                   | 4.5                      |

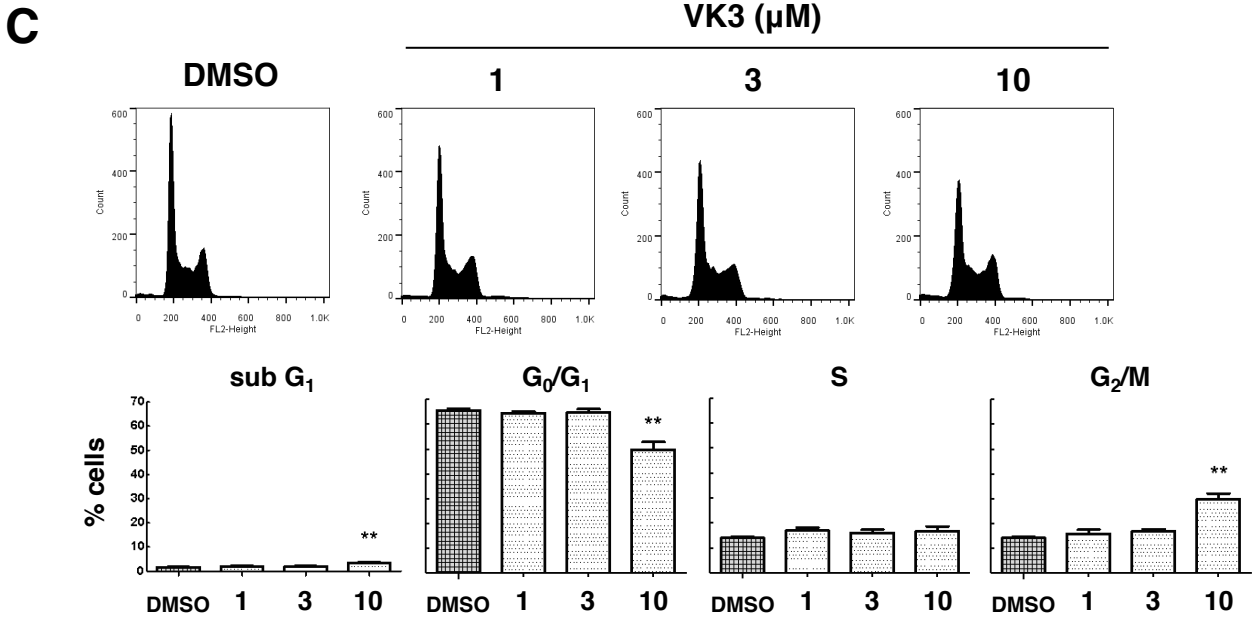

# Supplementary Figure S2

**A**

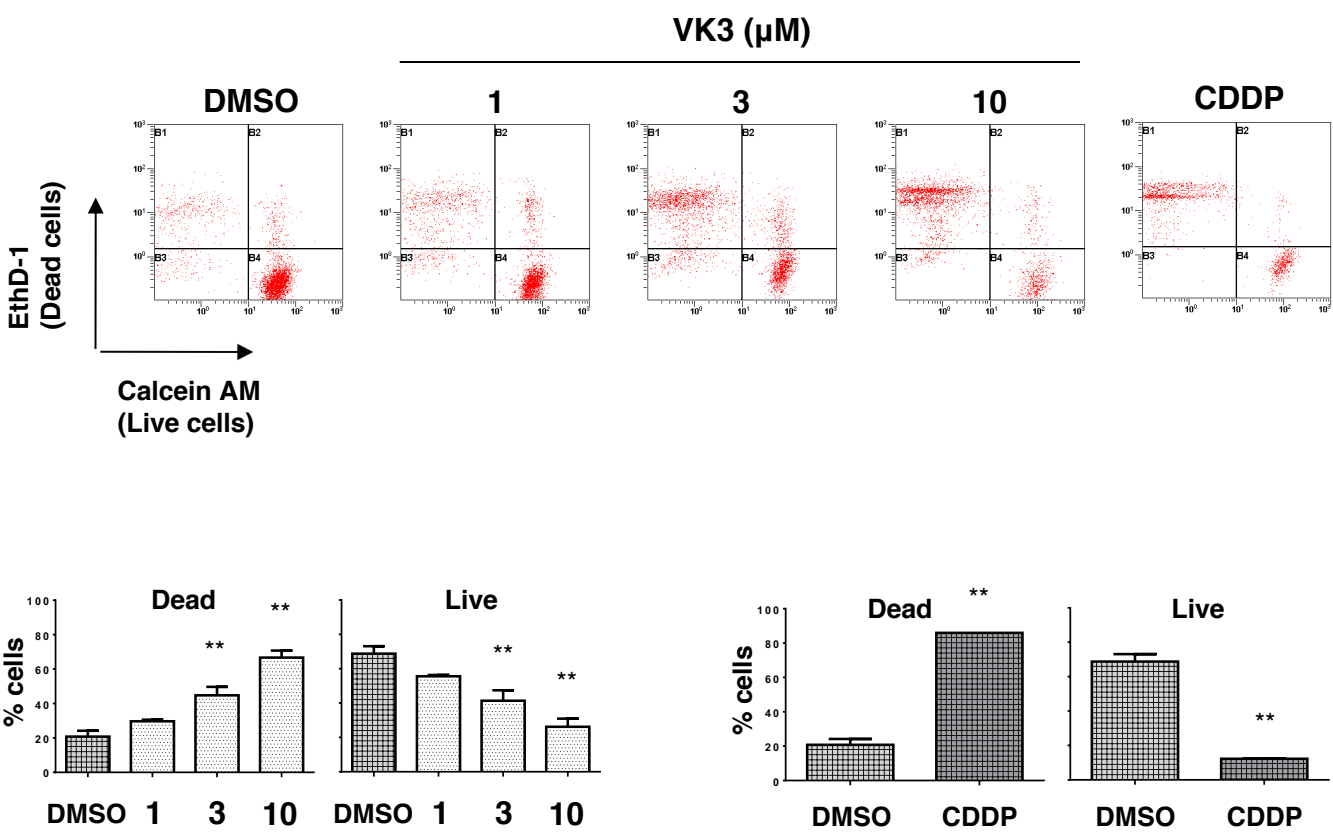

**B**

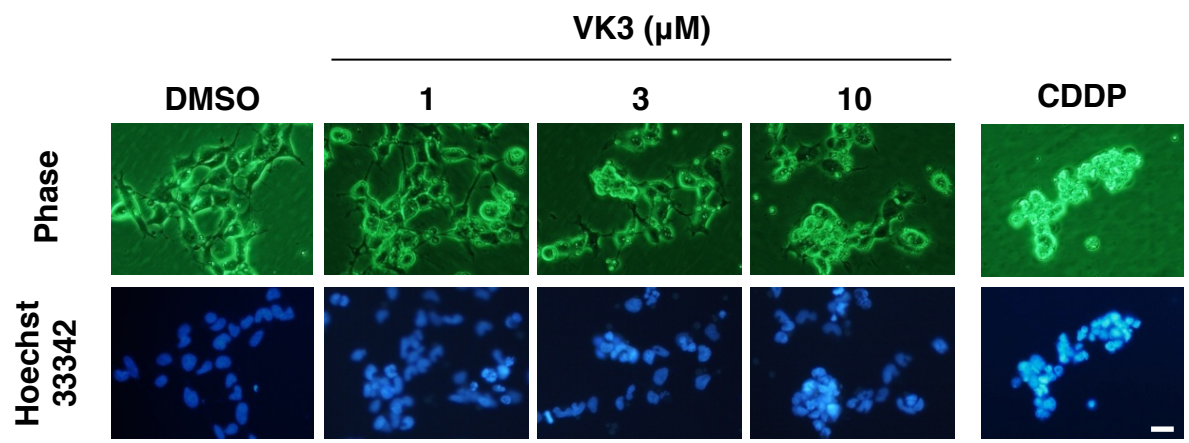

# Supplementary Figure S3

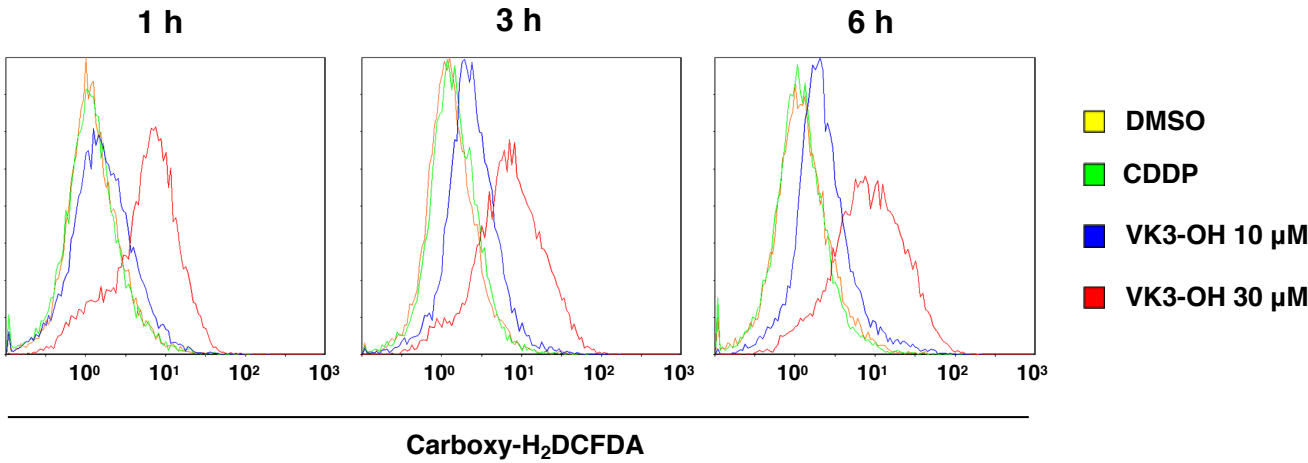

# Supplementary Figure S4

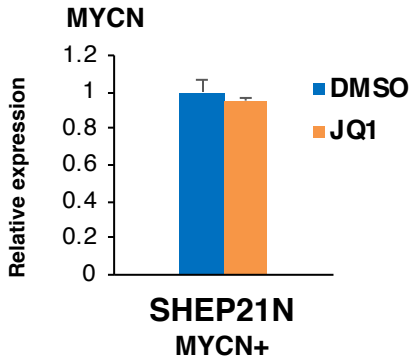

Supplement: mmc2.pdf [file mmc2.pdf]
